# Supplementary material for: Trends in Prevalence of Overweight and Obesity in Danish Infants, Children and Adolescents – Are We Still on a Plateau?
Source: PubMed Central journal article supplement (PMC3722196; doi:10.1371/journal.pone.0069860), 2013-07-24

**Supplementary figure 1. Prevalence of child overweight and obesity (IOTF) in the DHVCHD, 5-7 years (panel a & c) and in the DNBC, 5-8 years (panel b & d).**

**a) Overweight (IOTF) DHVCHD (5-7 years)**

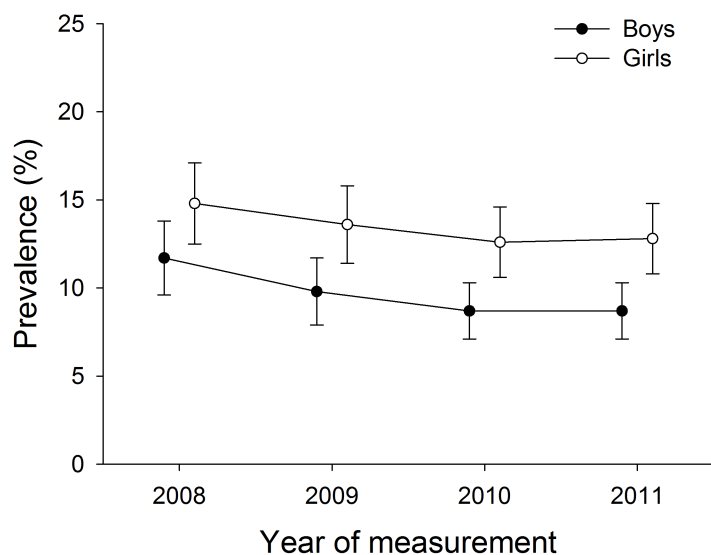

**b) Overweight (IOTF) DNBC (5-8 years)**

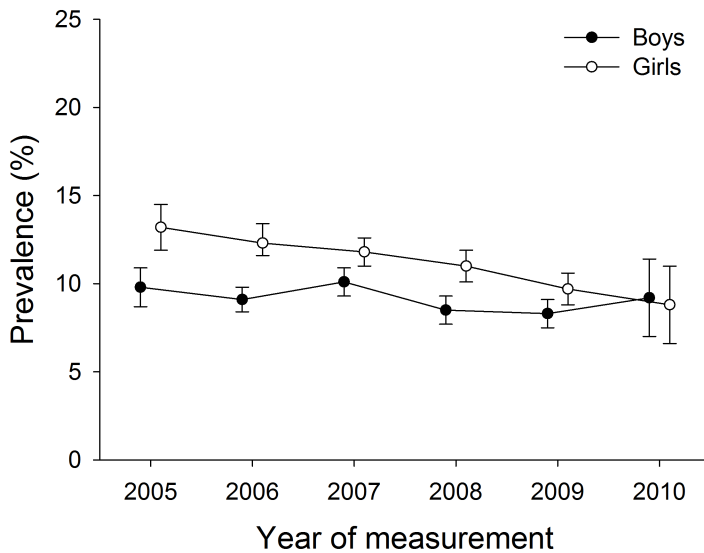

**c) Obesity (IOTF) DHVCHD (5-7 years)**

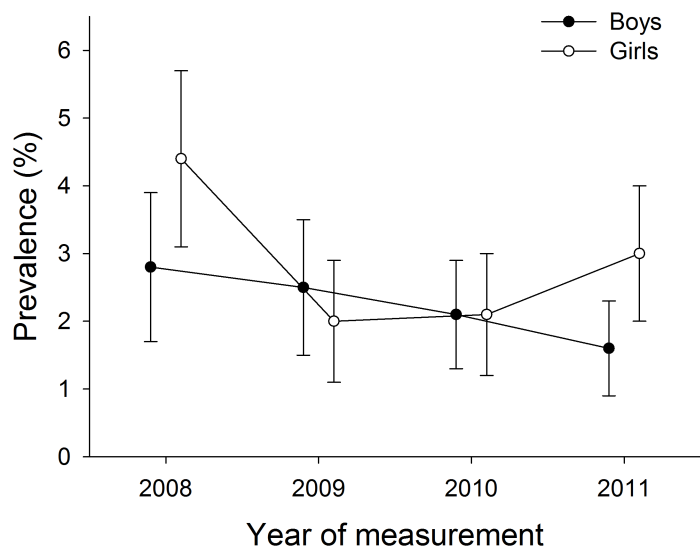

**d) Obesity (IOTF) DNBC (5-8 years)**

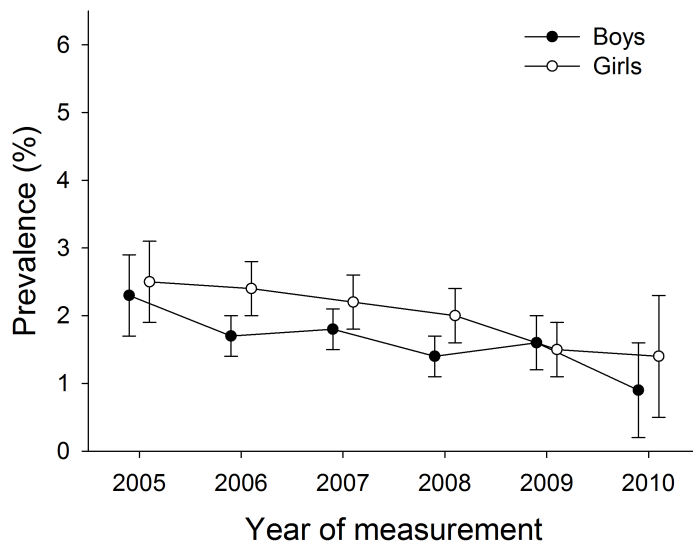

Supplement: pone.0069860.s001.pdf [file pone.0069860.s001.pdf]
