# Supplementary material for: Trends in Prevalence of Overweight and Obesity in Danish Infants, Children and Adolescents – Are We Still on a Plateau?
Source: PubMed Central journal article supplement (PMC3722196; doi:10.1371/journal.pone.0069860), 2013-07-24

**Supplementary figure 2. Prevalence of adolescent overweight (panel a & b) and obesity (panel c & d) (IOTF) in the HBSC.**

a) Overweight (IOTF) HBSC (11-13 years)

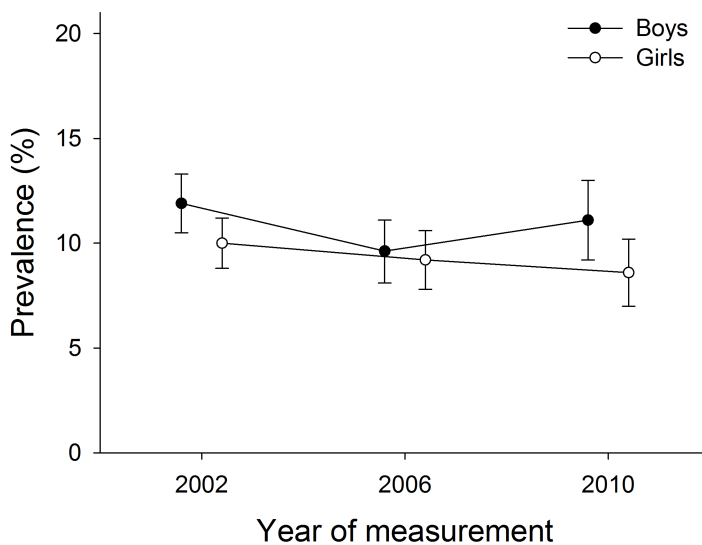

b) Overweight (IOTF) HBSC (14-16 years)

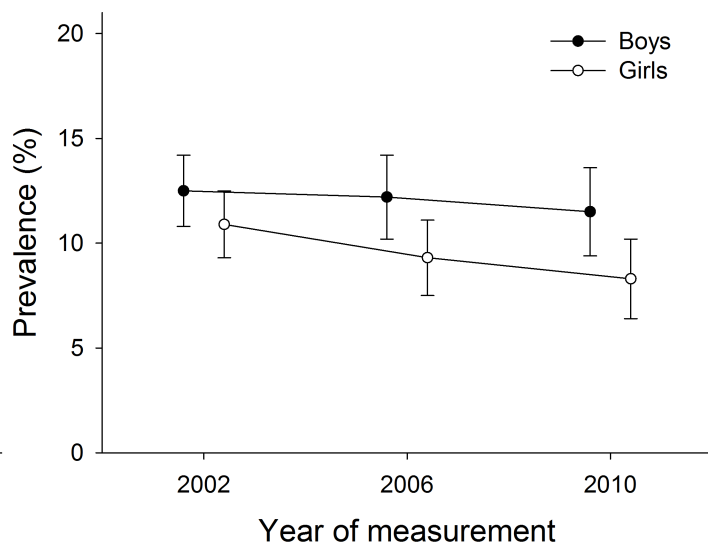

c) Obesity HBSC (11-13y)

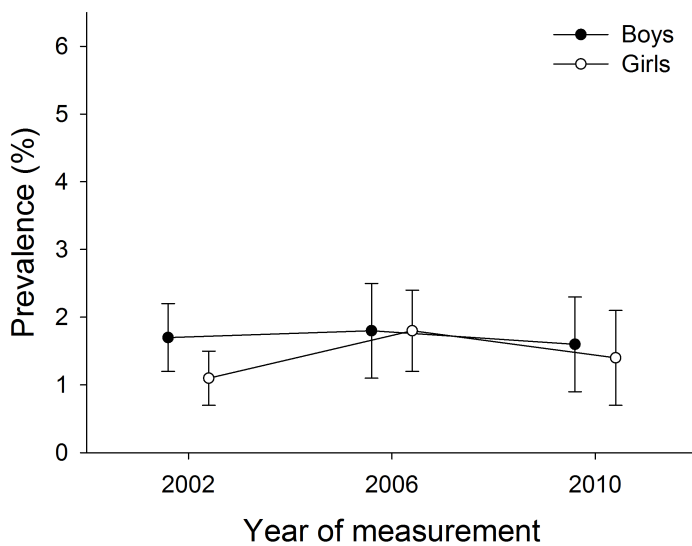

d) Obesity (IOTF) HBSC (14-16 years)

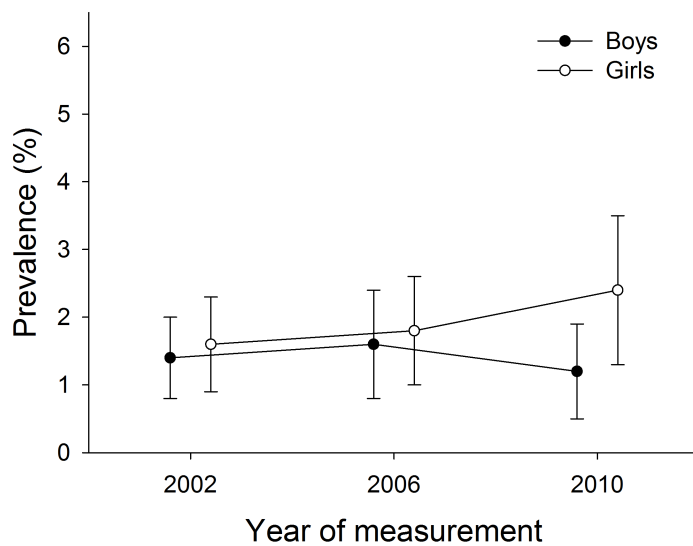

Supplement: pone.0069860.s002.pdf [file pone.0069860.s002.pdf]
